# Supplementary material
Source: MDPI journal article supplement (https://www.mdpi.com/2296-3529/9/1/8)
Supplement: s1 [file s1]

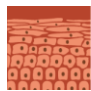

## Supplementary Figures

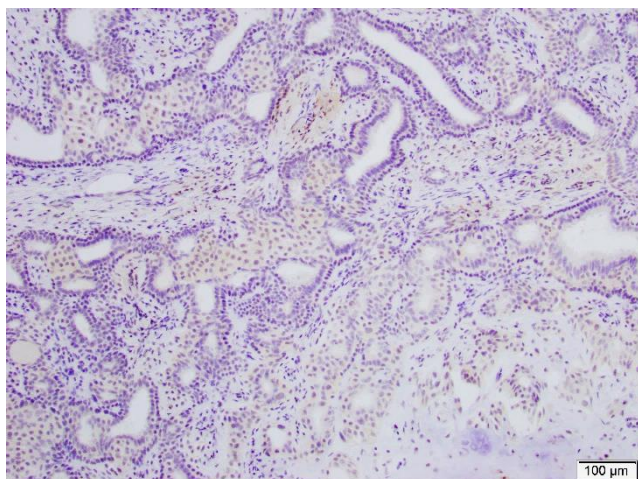

(a)

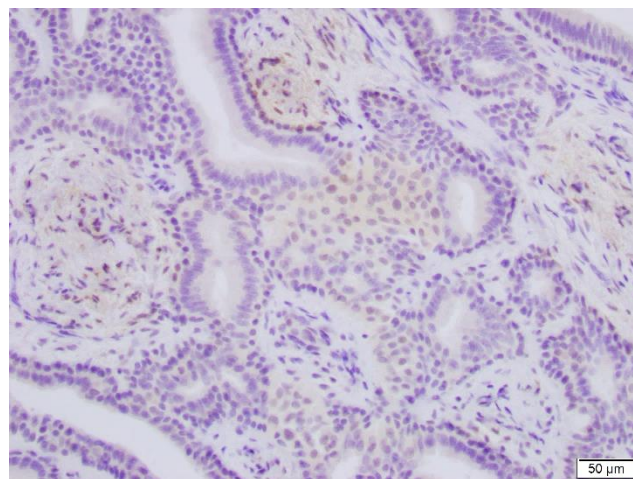

(b)

**Figure S1.** This figure shows weak (1+) TFE3 staining in less than 20% of tumor cells in case #5 with benign features (a - 10X, b - 20X).

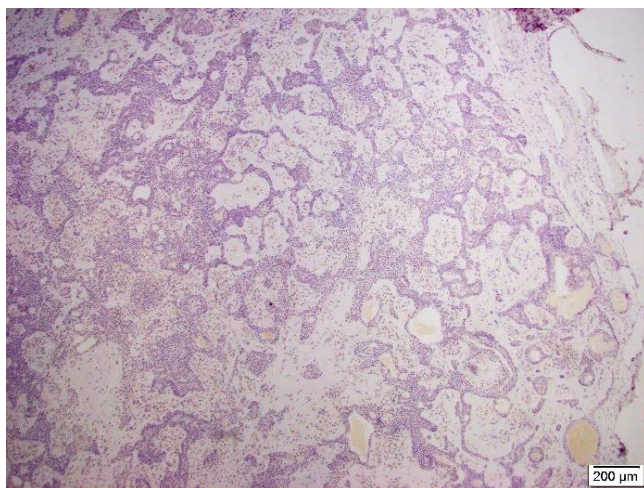

(a)

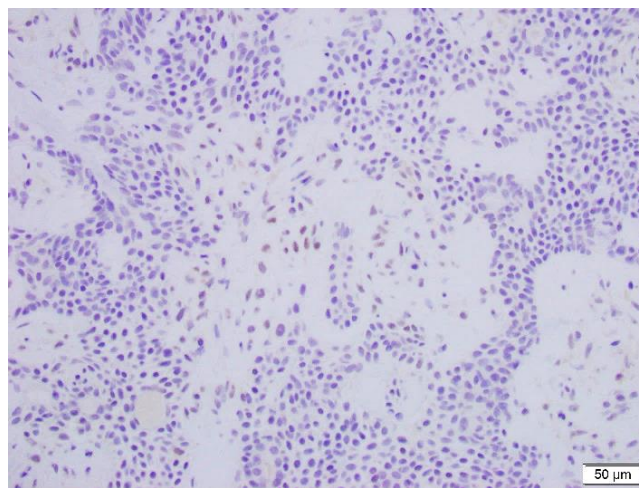

(b)

**Figure S2.** This figure shows weak (1+) TFE3 staining in less than 20% of tumor cells in case #6 with benign features (a - 4X, b - 20X).



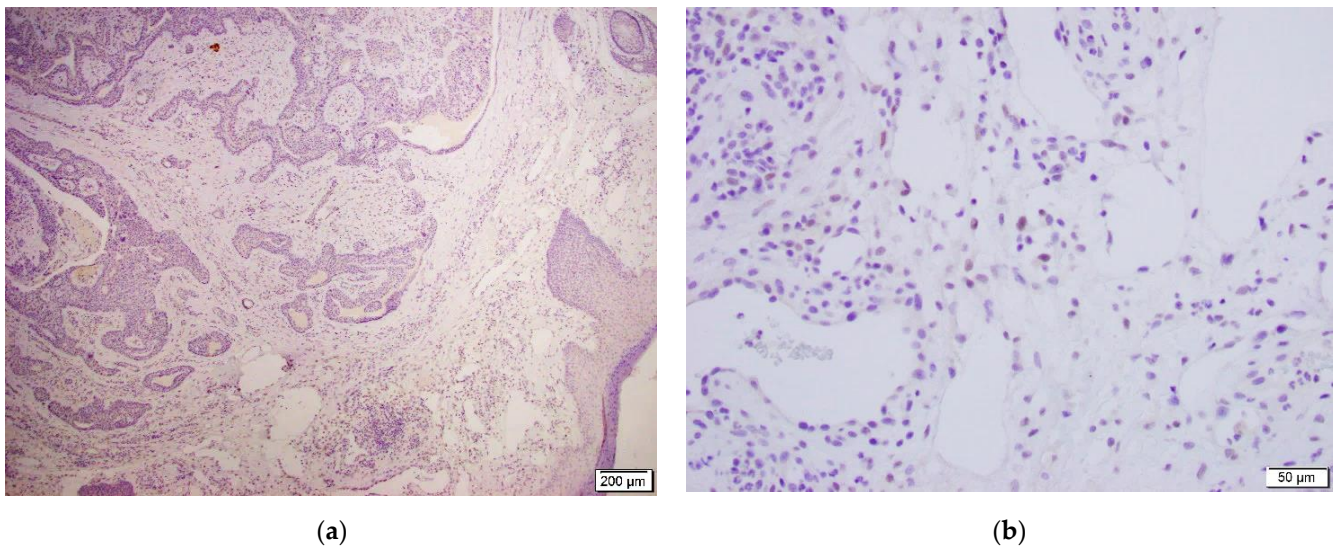

**Figure S3.** This figure shows weak (1+) TFE3 staining in less than 20% of tumor cells in case #7 with benign features (a - 4X, b - 20X).

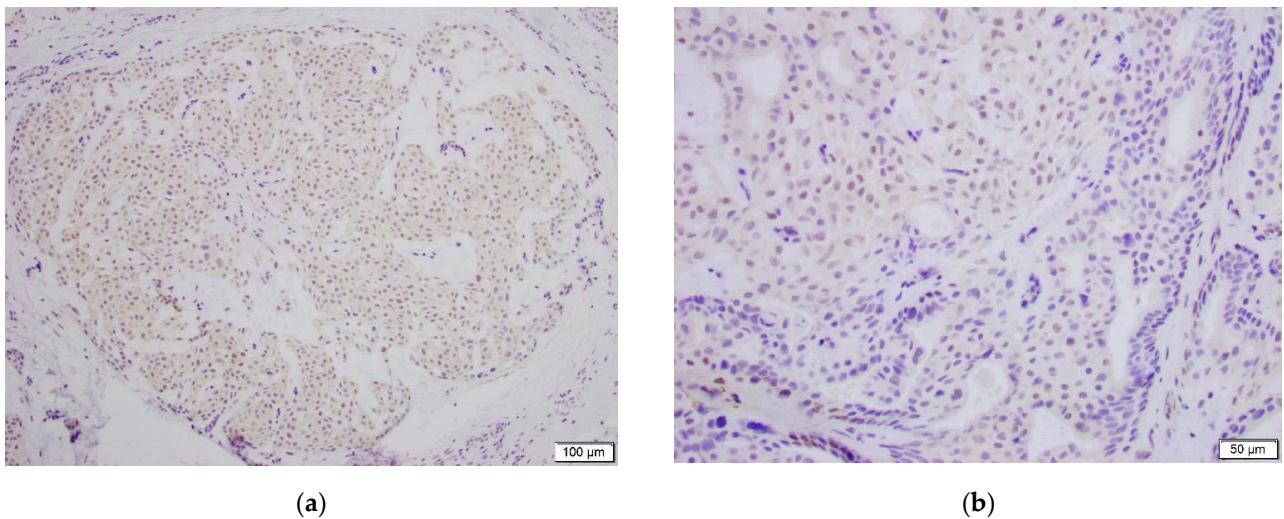

**Figure S4.** This figures shows weak (1+) TFE3 staining in less than 20% of tumor cells in case #8 with benign features (a - 10X, b - 20X).

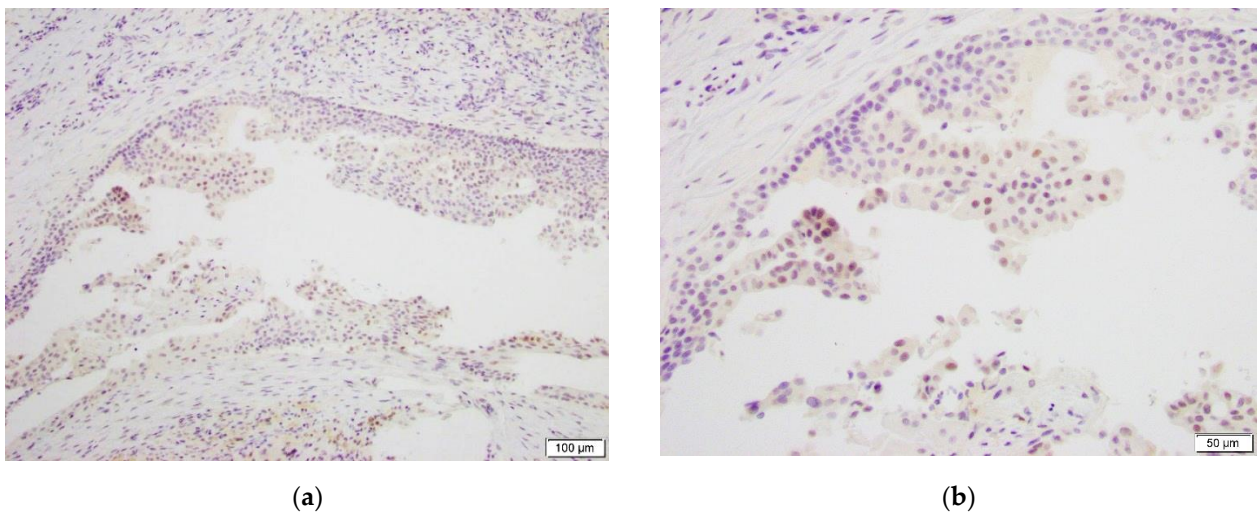

**Figure S5.** This figure shows weak (1+) TFE3 staining in less than 20% of tumor cells in case #9 with benign features (a - 10X, b - 20X).



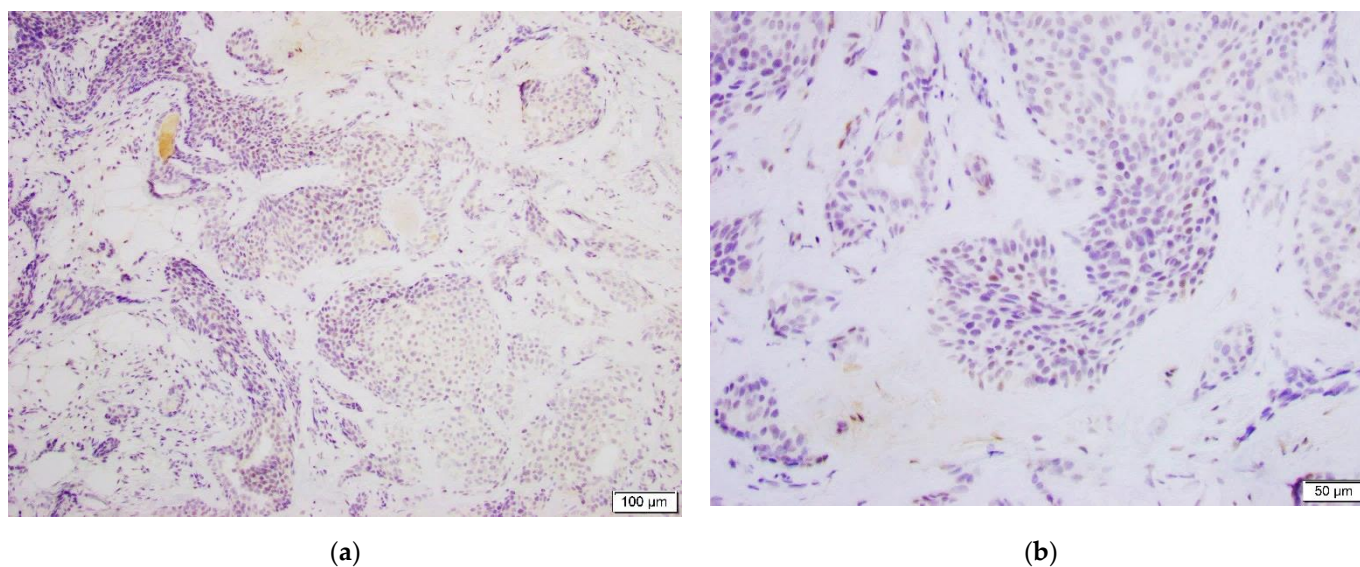

**Figure S6.** This figure shows weak (1+) TFE3 staining in less than 20% of tumor cells in case #10 with benign features (a - 10X, b - 20X).

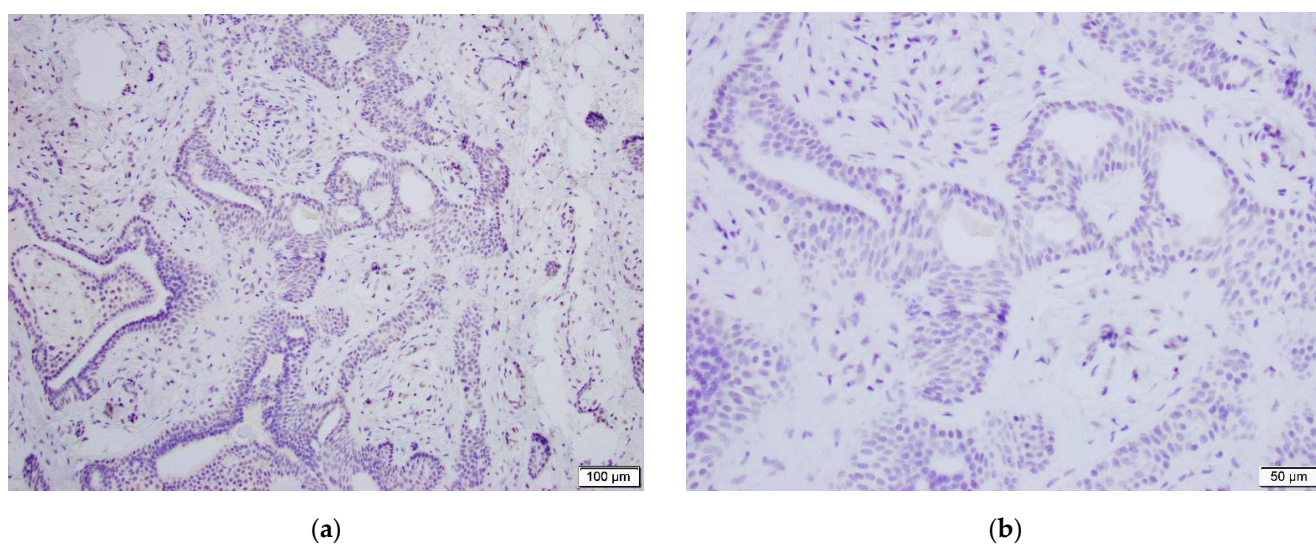

**Figure S7.** This figure shows negative TFE3 staining in case #3 with benign features (a - 10X, b - 20X).

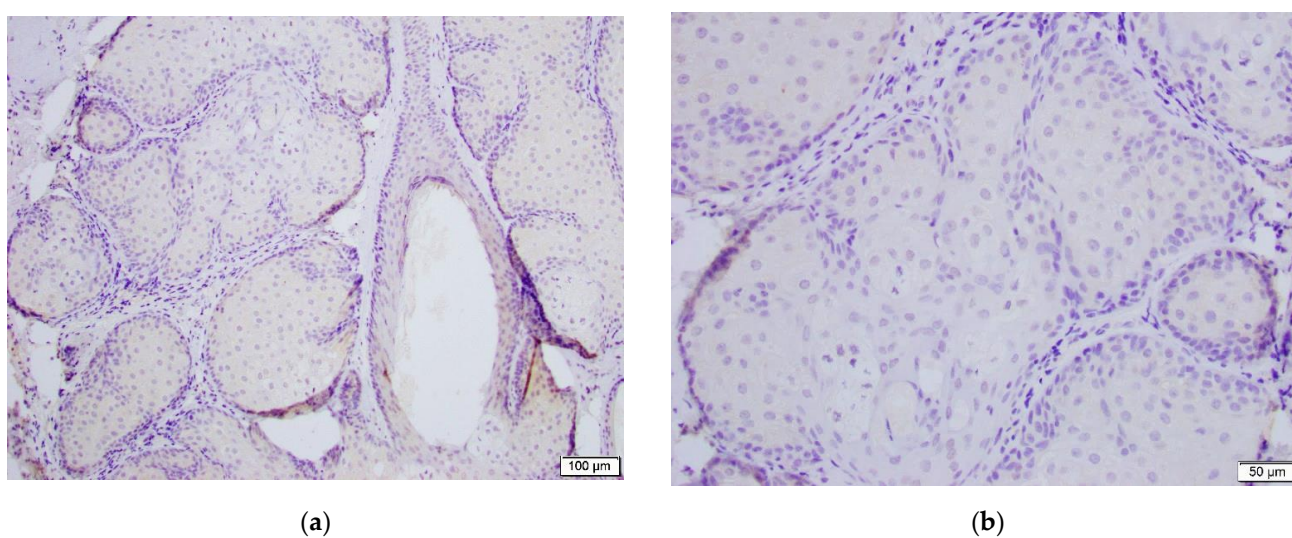



**Figure S8.** This figure shows negative TFE3 staining in case #4 with benign features (a - 10X, b - 20X).

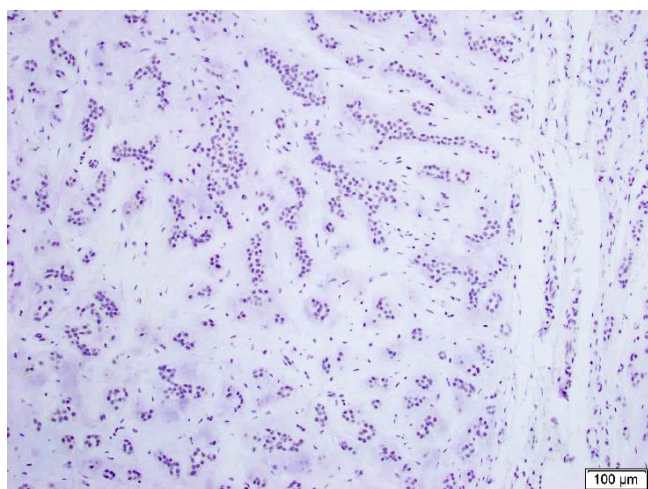

(a)

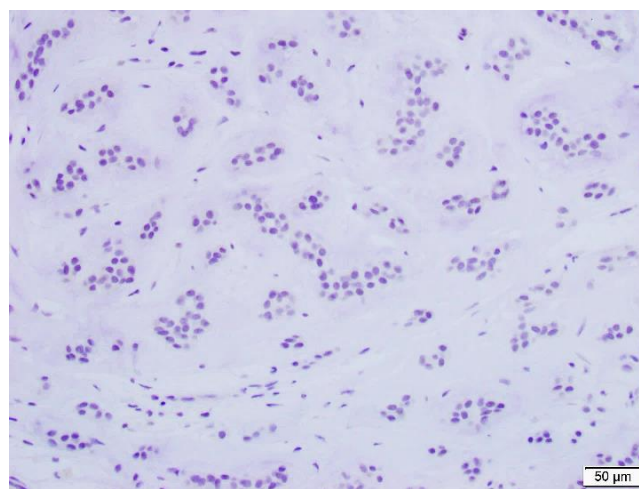

(b)

**Figure S9.** This figure shows negative TFE3 staining in case #11 with benign features (a - 10X, b - 20X).

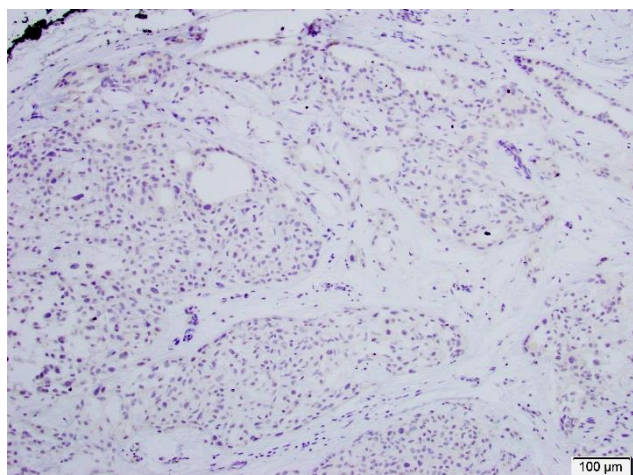

(a)

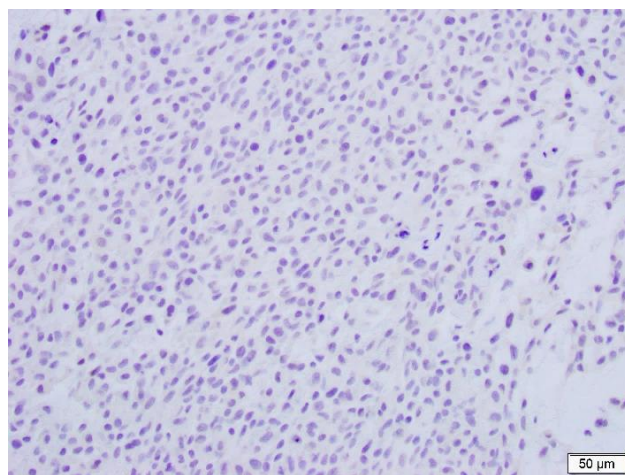

(b)

**Figure S10.** This figure shows negative TFE3 staining in case #12 with atypical features (a - 10X, b - 20X).
